# Supplementary material for: Toward the future of OECD/ISO biodegradability testing-new approaches and developments
Source: PubMed Central journal article supplement (PMC10033483; doi:10.1007/s00253-023-12406-6), 2023-03-03
Supplement: 253_2023_12406_MOESM1_ESM.pdf [file 253_2023_12406_MOESM1_ESM.pdf]

## Supplementary Material

### **Toward the future of OECD/ISO biodegradability testing - new approaches and developments**

Uwe Strotmann<sup>1</sup>, Gerald Thouand<sup>2</sup>, Udo Pagga<sup>3</sup>, Stefan Gartiser<sup>4</sup> and Hermann J. Heipieper<sup>5\*</sup>

<sup>1</sup>Westfälische Hochschule, Dept. of Chemistry, Recklinghausen, Germany  
(uwe.strotmann@w-hs.de)

<sup>2</sup>Nantes Université, ONIRIS, CNRS, GEPEA, UMR 6144, 85000 La Roche sur Yon, France,  
France, (gerald.thouand@univ-nantes.fr)

<sup>3</sup>Rüdigerstr. 49, 67069 Ludwigshafen, Germany (udo.pagga@t-online.de)

<sup>4</sup>Hydrotox GmbH, Bötzingen Str. 29, 79111 Freiburg, Germany (gartiser@hydrotox.de)

<sup>5</sup>Department of Environmental Biotechnology, Helmholtz Centre for Environmental Research  
- UFZ, Leipzig, Germany (hermann.heipieper@ufz.de)

\*corresponding author: Hermann J. Heipieper, hermann.heipieper@ufz.de

**Table S1. Data about existing chemicals (modified after Wang et al., 2020)**

|                                                                                  |              |
|----------------------------------------------------------------------------------|--------------|
| Number of chemicals and mixtures of chemicals registered for production and use: | > 350,000    |
| - claimed confidential                                                           | > 50,000     |
| - ambiguously described                                                          | up to 70,000 |
| Total chemicals with CAS numbers                                                 | 235,323      |
| - individual compounds                                                           | 157,896      |
| - organics                                                                       | 137,325      |
| - mixtures, polymers, UVCBs                                                      | 75,384       |

**Table S2. Microbial toxicity tests**

| Test                                                                  | Method                | Test principle                                                                                                                                |
|-----------------------------------------------------------------------|-----------------------|-----------------------------------------------------------------------------------------------------------------------------------------------|
| Inhibition of heterotrophic respiration                               | OECD 209<br>ISO 8192  | measurement of oxygen consumption due to heterotrophic respiration                                                                            |
| Inhibition of nitrification inhibition                                | OECD 209<br>ISO 9509  | measurement of oxygen consumption due to nitrification respiration (OECD 209) or ammonium oxidation, nitrite and nitrate formation (ISO 9509) |
| Luminescent bacteria test                                             | ISO 11348 part 1 to 3 | measurement of inhibition of light emission                                                                                                   |
| <i>Pseudomonas putida</i> growth inhibition test                      | ISO 10712             | measurement of growth inhibition of a growing pure culture of <i>Pseudomonas putida</i>                                                       |
| Growth inhibition test with activated sludge bacteria                 | ISO 15522             | measurement of growth inhibition of activated sludge bacteria                                                                                 |
| Determination of the inhibition of the activity of anaerobic bacteria | OECD 224<br>ISO 13641 | measurement of inhibition of biogas production                                                                                                |

**Table S3. Bin system of reference compounds (modified after Comber and Holt, 2007)**

There are four bins for classification:

Bin 1: normally passes a RBT or modified RBT

Bin 2: normally passes an enhanced RBT, but currently fails any other RBT

Bin 3: normally fails any RBT

Bin 4: should never pass an enhanced or modified RBT

| Classification | Compounds                                                                                       |
|----------------|-------------------------------------------------------------------------------------------------|
| Bin 1          | Aniline, sodium benzoate, 1-octanol, anthraquinone, phenol                                      |
| Bin 2          | Diethylene glycole, 4-chloroaniline, 1,3,5-trimethylbenzene, Dinitrotoluene, 4-Fluorophenol     |
| Bin 3          | Di-isotridecyladipate, Cyclododecane, Cyclododeca-1,5,9- triene , Cyclododecane , Dibutylphenol |
| Bin 4          | Musk xylene , Hexachlorobenzene, Benzo(a)pyrene, Hexachlorohexane                               |

**Table S4. Biodegradation of some commonly used reference compounds recommended by the OECD**

| Compound                      | Test system                  | Extent of degradation (%) | References                                                            |
|-------------------------------|------------------------------|---------------------------|-----------------------------------------------------------------------|
| Benzoic acid, sodium benzoate | OECD 301 F                   | 91 - 93                   | Reuschenbach et al., 2003; Gu et al., 2020                            |
| Aniline                       | OECD 301 A - F               | 75 - 98                   | Reuschenbach et al., 2003, Strotmann, et al., (2004), Gu et al., 2020 |
|                               | MCTS*                        |                           | Strotmann et al., 2004                                                |
|                               | - DOC elimination            | 96                        |                                                                       |
|                               | - oxygen consumption         | 82.5                      |                                                                       |
|                               | - CO <sub>2</sub> production | 83                        |                                                                       |
|                               | CTS**                        |                           | Strotmann et al., 1995                                                |
|                               | - DOC elimination            | > 95                      |                                                                       |
|                               | - CO <sub>2</sub> production | 78                        |                                                                       |
|                               | OECD 302 B                   | 98                        | Reuschenbach et al., 2003                                             |
| Diethylene glycole            | OECD 301 F                   | 59 - 93                   | Reuschenbach et al, 2003; Gartiser et al., 2022                       |
|                               | CTS**                        |                           | Strotmann et al., 1995, Gartiser et al., 2022                         |
|                               | - DOC elimination            | > 95 - 98                 |                                                                       |
|                               | - CO <sub>2</sub> production | 90 - 99                   |                                                                       |
|                               | OECD 302 B                   | 70                        | Comber et al., (2010); Lapertot et al., 2006                          |
| Sodium acetate                | OECD 301 F                   | > 95                      | Gu et al., 2020                                                       |
| Sodium benzoate               | OECD 301 F                   | > 95                      | Gu et al., 2020                                                       |
| 1-octanol***                  | OECD 310                     | 85                        | Comber et al., 2010; Battersby et al., 1997                           |

\* multi component test system based on OECD 301 tests; \*\* combined test system based on OECD 301 A/B tests; \*\*\* water insoluble compound
